# Supplementary material
Source: PubMed Central journal article supplement (PMC3993421)
Supplement: IAI.01639-13_zii999090618so1.pdf [file IAI.01639-13_zii999090618so1.pdf]

```

M3 rivR   CGGTAGATTCGCTACAATATATAGGATTATACAATTTAATTTAAGGAGAGAAAAATTACATGGTTAGATTATTATTGGA
M1 rivR   CGGTAGATTCGCTACAATATATAGGATTATACAATTTAATTTAAGGAGAGAAAAATTACATGGTTAGATTATTATTGGA
*****

M3 rivR   ATCCGATATTATTGACCAGAAAATCCTACTGGCTATTTTGTGTGACAGAAAAAGAACTGACGATGGCAGCAGCTTGTTCCTC
M1 rivR   ATCCGATATTATTGACCAGAAAATCCTACTGGCTATTTTGTGTGACAGAAAAAGAACTGACGATGGCAGCAGCTTGTTCCTC
*****

M3 rivR   AAACAACCTTTGACTGCTTTAAAAATAAAGCAGTATCTTCGACAAATTTAACGCCTTATTTAAAGGGTACTTACGTATTGAG
M1 rivR   AAACAACCTTTGACTGCTTTAAAAATAAAGCAGTATCTTCGACAAATTTAACGCCTTATTTAAAGGGTACTTACGTATTGAG
*****

M3 rivR   CTTATTAATCTCGTATTATTGTGAGGTATTAATGATAAGCGAGAAGCATTTTT-AAGACATTTTTCGCTTATCAGA
M1 rivR   CTTATTAATCTCGTATTATTGTGAGGTATTAATGATAAGCGAGAAGCATTTTTATGACATTTTTCGCTTATCAGA
*****
1bp deletion

M3 rivR   TACTCTAAAAATGTTGACATCTTATTACTAGATAATCCCAAACACAAATCAATCGCTGTTTATACACGAAAACAAGGGA
M1 rivR   TACTCTAAAAATGTTGACATCTTATTACTAGATAATCCCAAACACAAATCAATCGCTGTTTATACACGAAAACAAGGGA
*****

M3 rivR   TATCCAGTCAAAGCTTATCGTCTTATTCATAAATAAAACATTATTTACAAGACATTGGTTTAAATATTGTAGACAAT
M1 rivR   TATCCAGTCAAAGCTTATCGTCTTATTCATAAATAAAACATTATTTACAAGACATTGGTTTAAATATTGTAGACAAT
*****

M3 rivR   ACTGTTATCGGAGATGAACCTAAAATACGGTATTTGATGCTCTTTTACATAAAGAGTACGGCATTATATTATATGATAT
M1 rivR   ACTGTTATCGGAGATGAACCTAAAATACGGTATTTGATGCTCTTTTACATAAAGAGTACGGCATTATATTATATGATAT
*****

M3 rivR   ACAACCTGCAGACATTGAAACGATTCATGCTTTTATCTTTGCAGCACAAAAAACTTACAACCTTCTGCCTTTTAGATA
M1 rivR   ACAACCTGCAGACATTGAAACGATTCATGCTTTTATCTTTGCAGCACAAAAAACTTACAACCTTCTGCCTTTTAGATA
*****

M3 rivR   GACGCTTCTGTTTTTGTATGCTGTTGATGTTGACTTGAAGCGCCATCGCTATCTGTTTCAATTTGCCTCATTAGCT
M1 rivR   GACGCTTCTGTTTTTGTATGCTGTTGATGTTGACTTGAAGCGCCATCGCTATCTGTTTCAATTTGCCTCATTAGCT
*****

M3 rivR   CTTTTGAACATCTCAAATCCTTGCTATTTTGAACAATCAAACCATGCGGTGGATGACCCAGTACCTCGAACTCG
M1 rivR   CTTTTGAACATCTCAAATCCTTGCTATTTTGAACAATCAAACCATGCGGTGGATGACCTAGTACCTCGAACTCG
*****
SNP1

M3 rivR   TGTACATTTTCTGCTGATGATTTTACTATCTCTTTTAAATTTATTTAACGACTGATAACTCCTTCTGAGTGGGTACT
M1 rivR   TGTACATTTTCTGCTGATGATTTTACTATCTCTTTTAAATTTATTTAACGACTGATAACTCCTTCTGAGTGGGTACT
*****

M3 rivR   GGACAAGTCATCAGCGACAACAACCTTTACCATTAAATCACCAAGATCCCGATTATCATTTACTAATCCATCGTCTTCCAG
M1 rivR   GGACAAGTCATCAGCGACAACAACCTTTACCATTAAATCACCAAGATCCCGATTATCATTTACTAATCCATCGTCTTCCAG
*****

M3 rivR   GCAC TAGTGGAACTTTCGATATTCATGAGCATATCCCTAACTTAATTCCTTTTTTCAAAGAACTCTCTACAATTT
M1 rivR   GCAC TAGTGGAACTTTCGATATTCATGAGCATATCCCTAACTTAATTCCTTTTTTCAAAGAACTCTCTACAATTT
*****
SNP2

M3 rivR   ACAAACTTAATACCTTTGATGTTTATTTTGTATCAATATCAAGGCAACATGCTACTACTAGATAAGCTTGAACCG
M1 rivR   ACAAACTTAATACCTTTGATGTTTATTTTGTATCAATATCAAGGCAACATGCTACTACTAGATAAGCTTGAACCG
*****

M3 rivR   TTATCAAAGATTGGCTTTATGACACAGCCGTCAGGCGAGTATTAGTTCTGGTCACTTACACTTGTATGTTTATACCTT
M1 rivR   TTATCAAAGATTGGCTTTATGACACAGCCGTCAGGCGAGTATTAGTTCTGGTCACTTACACTTGTATGTTTATACCTT
*****

M3 rivR   GAGCAGATCTTGGAAAGCTCTATTGCTCCAATCAATATTACTGTTATTGAGAGCCAAGAACTGTTGTAACGTTATAGC
M1 rivR   GAGCAGATCTTGGAAAGCTCTATTGCTCCAATCAATATTACTGTTATTGAGAGCCAAGAACTGTTGTAACGTTATAGC
*****

M3 rivR   TAATTTTCATCACCTCAACTATCCCTTCTTACAAGTTGACTGTGTCACGGGTCATATCTTATCTGATAATATTATCCCT
M1 rivR   TAATTTTCATCACCTCAACTATCCCTTCTTACAAGTTAATCTGTGTCACGGGTCATATCTTATCTGATAATATTATCCCT
*****
SNP3

M3 rivR   ATGATAAACCTGTAGATCTGGTTTGTGACAGTGTGAGGCTCTTGCCTTTCTTAAAGAAGCTCGGTGTTTTTCCCAAAGAG
M1 rivR   ATGATAAACCTGTAGATCTGGTTTGTGACAGTGTGAGGCTCTTGCCTTTCTTAAAGAAGCTCGGTGTTTTTCCCAAAGAG
*****
SNP4

M3 rivR   ACCCGCTTGTGTTGAGTTTGGACTGTATCCAACAGCAGCGCGAAGATTTAATCAAACCATCTTAGCCTTGCACCA
M1 rivR   ACCCGCTTGTGTTGAGTTTGGACTGTATCCAACAGCAGCGCGAAGATTTAATCAAACCATCTTAGCCTTGCACCA
*****

M3 rivR   GAACCCTACCAAAAACGTTTAGAAGAAGTTGGAGAGTTCCTTCTTAA
M1 rivR   GAACCCTACCAAAAACGTTTAGAAGAAGTTGGAGAGTTCCTTCTTAA
*****

```

**Figure S1**  
**Alignment of the *rivR* gene from the clinical strains MGAS2221 and MGAS10870.** The *rivR* gene plus upstream 60 nucleotides were aligned between MGAS2221 (M1 *rivR*) and MGAS10870 (M3 *rivR*). Red asterisks highlight nucleotide identity while gaps and blue ovals highlight differences. The start codon (TTG) is colored green and the stop codon (TAA) is colored red.

|         | 10                                                             | 20  | 30  | 40  | 50  | 60  |
|---------|----------------------------------------------------------------|-----|-----|-----|-----|-----|
| M1 RivR | MLDYYLESDIIDQKILLAILLTEKELTMAAACSQTTLTALKIKQYLRQFNALFKGYLRIE   |     |     |     |     |     |
| M3 RivR | MLDYYLESDIIDQKILLAILLTEKELTMAAACSQTTLTALKIKQYLRQFNALFKGYLRIE   |     |     |     |     |     |
|         | *****                                                          |     |     |     |     |     |
|         | 70                                                             | 80  | 90  | 100 | 110 | 120 |
| M1 RivR | LIKSRIYCEVLNDKREAFFYDIFALSDTLKMLTFLLLDNPKHKSIAVYTRKQGISQSKAY   |     |     |     |     |     |
| M3 RivR | LIKSRIYCEVLNDKREAFFYDIFALSDTLKMLTFLLLDNPKHKSIAVYTRKQGISQSKAY   |     |     |     |     |     |
|         | *****                                                          |     |     |     |     |     |
|         | 130                                                            | 140 | 150 | 160 | 170 | 180 |
| M1 RivR | RLIHKLKHYLQDIGLNIVDNTVIGDELKIRYLIALLHKEYGIILYDIQPADIETIHAFIF   |     |     |     |     |     |
| M3 RivR | RLIHKLKHYLQDIGLNIVDNTVIGDELKIRYLIALLHKEYGIILYDIQPADIETIHAFIF   |     |     |     |     |     |
|         | *****                                                          |     |     |     |     |     |
|         | 190                                                            | 200 | 210 | 220 | 230 | 240 |
| M1 RivR | AAQKNLQPSAFLDRRFLFFDVLLMLTWKRHRYPVHLPALFEHLKSLPIFDNIKTIAVD     |     |     |     |     |     |
| M3 RivR | AAQKNLQPSAFLDRRFLFFDVLLMLTWKRHRYPVHLPALFEHLKSLPIFDNIKTIAVD     |     |     |     |     |     |
|         | *****                                                          |     |     |     |     |     |
|         | 250                                                            | 260 | 270 | 280 | 290 | 300 |
| M1 RivR | ELAPRTRVTFSSDDFDYLFLLIYLTDDNSFLSGYWTSHQRQQLYHLITKDPDYHLLIHLRQ  |     |     |     |     |     |
| M3 RivR | EPAPRTRVTFSSDDFDYLFLLIYLTDDNSFLSGYWTSHQRQQLYHLITKDPDYHLLIHLRQ  |     |     |     |     |     |
|         | *****                                                          |     |     |     |     |     |
|         | 310                                                            | 320 | 330 | 340 | 350 | 360 |
| M1 RivR | ALVGVKYSIDIEHIPNLIPIFFKRTLYNLQTLITFDGYYFDQYQGNMLLLDKLETVIKDWLY |     |     |     |     |     |
| M3 RivR | ALVGNYSIDIEHIPNLIPIFFKRTLYNLQTLITFDGYYFDQYQGNMLLLDKLETVIKDWLY  |     |     |     |     |     |
|         | *****                                                          |     |     |     |     |     |
|         | 370                                                            | 380 | 390 | 400 | 410 | 420 |
| M1 RivR | DTGRQGSISSGHLHLMCLYLEQILESSIAPINITVIESQETVGNVIANFITSTIPSYKVK   |     |     |     |     |     |
| M3 RivR | DTGRQGSISSGHLHLMCLYLEQILESSIAPINITVIESQETVGNVIANFITSTIPSYKVE   |     |     |     |     |     |
|         | *****                                                          |     |     |     |     |     |
|         | 430                                                            | 440 | 450 | 460 | 470 | 480 |
| M1 RivR | LSRVNILSDNIYPYDKPVDLVVTSQKLLPFLKELGVFPKETRLFGLSLDCIQQREDLIK    |     |     |     |     |     |
| M3 RivR | LSRVNILSDNIYPYDKPVDLVVTSQKLLPFLKELGVFPKETRLFGLSLDCIQQREDLIK    |     |     |     |     |     |
|         | *****                                                          |     |     |     |     |     |
|         | 490                                                            | 500 |     |     |     |     |
| M1 RivR | TILALHQNHYQKRLEELWRVPS                                         |     |     |     |     |     |
| M3 RivR | TILALHQNHYQKRLEELWRVPS                                         |     |     |     |     |     |
|         | *****                                                          |     |     |     |     |     |

**Figure S2**

**RivR amino acid alignment between strains MGAS2221 and 10870rivR<sup>+1bp</sup>.** Fixing the 1 bp deletion in the *rivR* gene of M3 GAS results in a protein with three amino acid substitutions relative to the RivR protein of MGAS2221 (highlighted with ovals). An asterisk highlights the location of the truncation, caused by the 1 bp deletion, in clinical M3 GAS *rivR* alleles.

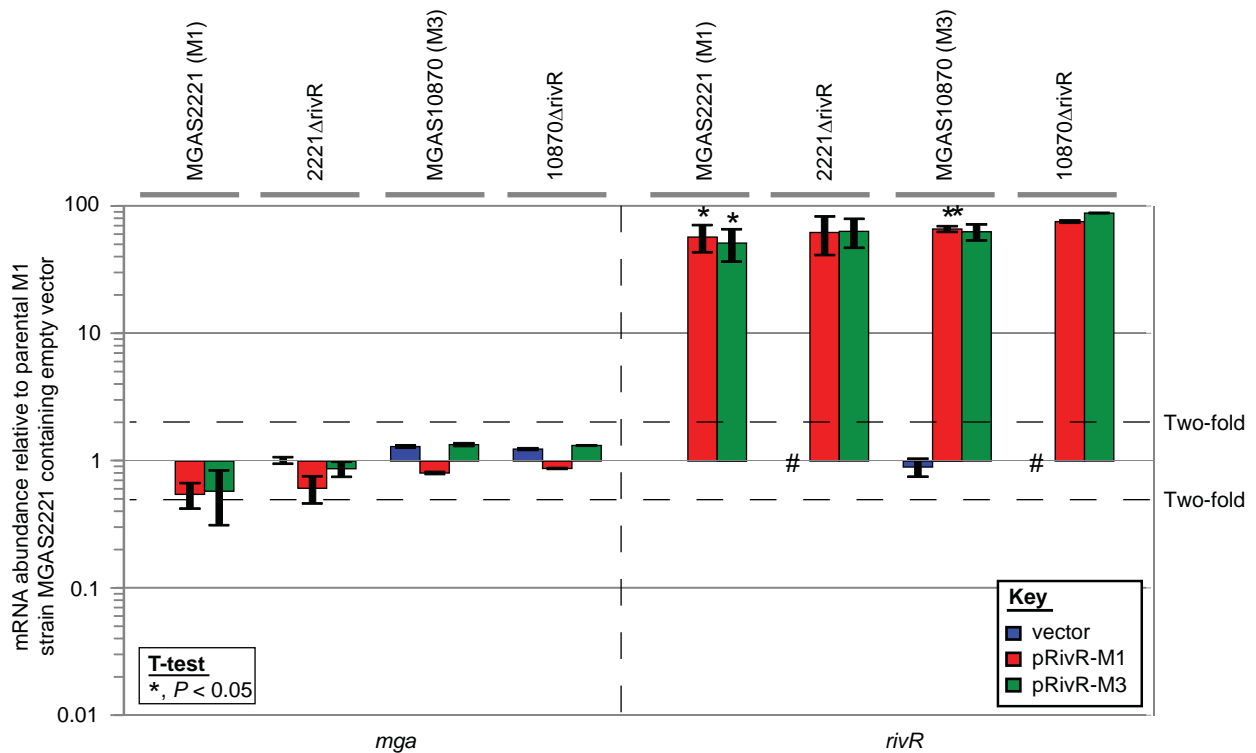

**Figure S3**

**Analysis of *mga* and *rivR* mRNA levels between M1 and M3 GAS isolates containing different plasmid-encoded *rivR* alleles.**

Parental (MGAS2221) and full *rivR* deletion mutant (2221Δ*rivR*) M1 isolates, and parental (MGAS10870) and full *rivR* deletion mutant (10870Δ*rivR*) M3 isolates, were compared following transformation with either empty vector, a plasmid containing *rivR* from M1 GAS strain MGAS2221 (pRivR-M1), or a plasmid containing *rivR* from M3 GAS strain MGAS10870 (pRivR-M3). RNA from exponential phase cultures of the indicated strains were analyzed for *mga* and *rivR* mRNA levels by quantitative RT-PCR. Experiment was performed in triplicate with mean (± standard deviation) shown. Hashes (#) highlight the lack of detectable *rivR* mRNA in the two *rivR* mutant strains containing empty vector. Asterisks (\*) highlight those samples that were statistically significantly different, via T-test, relative to the respective empty vector-containing strain.

**A**

```

      10      20      30      40      50      60      70      80      90     100
M1 grab    ATGATATCCTAACTAATATTATTAATTTTAATGCTAAAATAATGAGTTGACGGTAGTAAAGTGATAAATAAACACTCCTTAAAATAATTATTTTATTAAT
M3 grab    ATGATATCCTAACTAATATTATTAATTTTAATGCTAAAATAATGAGTTGACGGTAGTAAAGTGATAAATAAACACTCCTTAAAATAATTATTTTATTAAT
*****

      110     120     130     140     150     160     170     180     190     200
M1 grab    TTTTAAAAAATAATATATAAATTAGATAATAAACTTGATTTTATGCAATTAATCTGTATAATAAAAGATGGAATTATAATTATAATTCCAAATTAT
M3 grab    TTTTAAAAA-TAATATATAAATTAGATAATAAACTTGATTTTATGCAATTAATCTGTATAATAAAAGATGGAATTATAATTATAATTCCAAATTAT
*****

      210     220     230     240     250
M1 grab    CGGTAATTTAATATGCTAATGCATATAAAAATAAAAAGGAGAAACAATG
M3 grab    CGGTAATTTAATATGCTAATGCATATAAAAATAAAAAGGAGAAACAATG
*****

```

**B**

```

      10      20      30      40      50      60      70      80      90     100
M1 hasA    TTTTTCACAAAATTAGATAAACTAATTTGAAAAGTTTCTAAAATAATTTATAACAATTCAATTATTTTGAGATAAATTTATATTAATAAAATTATCCT
M3 hasA    TTTTTCATAAAATTAGATAAACTCTTGAAAAGTTTACTAAAATAATTTATAACAATTCAA-----TTATCCT
*****

      110     120     130     140     150     160     170     180     190     200
M1 hasA    GATTTTCTTTTTTGGGGGAAATTTTTTAATTAAATACATTTTTATTAATAAATATTTCTATGACTAGTTGACATTACCCCTTATTTATATTAGAATAT
M3 hasA    GATTTTCTTTTTCGGGGAAATTTTTTAATTGAAACACAATTTTATTAATAAATATCTCTATGCTAGTTGACATTATTTCTTATTTATATTAGAATAT
*****

      210     220     230     240     250
M1 hasA    CGAGGTCCTGTCTTTCAAGGAAATAAAAAGAAAGAGGTGTAATTGTG
M3 hasA    TGAGGCCCTTA-CITTCAGGAAATAAAAAGAAAGAGGTGTAATTGTG
*****

```

**Figure S4.** Alignment of the nucleotides upstream of the *grab* and *hasA* mRNAs in strains MGAS2221 and MGAS10870. Nucleotides upstream of *grab* (A) or *hasA* (B) in the serotype M1 strain MGAS2221 and the serotype M3 strain MGAS10870 were aligned. Red nucleotides and asterisks highlight identity while black nucleotides highlight differences. The start codons of *grab* and *hasA* are shown in blue.

| Primer name | Sequence (5' - 3')                                            | Role                                                                                                                                                                                                        |
|-------------|---------------------------------------------------------------|-------------------------------------------------------------------------------------------------------------------------------------------------------------------------------------------------------------|
| FASXNF      | CTTATTACGACTCACTATAGGGAGCAAAACAAAGACAACACTGACATCG             | Forward primer containing T7 promoter sequence that is used to generate template for <i>in vitro</i> transcription of a FasX-specific RNA probe                                                             |
| FASXNR      | GAAGTCATGAGTTTATCGAG                                          | Reverse primer that is used to generate template for <i>in vitro</i> transcription of a FasX-specific RNA probe                                                                                             |
| 5SF         | CTTAATACGACTCACTATAGGGAGCTAAGCGACTACCTTATCTC                  | Forward primer containing T7 promoter sequence that is used to generate template for <i>in vitro</i> transcription of a 5S RNA-specific RNA probe                                                           |
| 5SR         | GTTAAGTGACGATAGCCTAG                                          | Reverse primer that is used to generate template for <i>in vitro</i> transcription of a 5S RNA-specific RNA probe                                                                                           |
| FASCA       | CTTGCTTATCTGCTGATTTTCC                                        | Used in construction of the <i>fasC</i> mutant strain 2221Δ <i>fasC</i> (left flank primer)                                                                                                                 |
| FASCB       | GTTATAGTTATTAAACATGTAATGGTAGCATAGAATAAAGCCATAC                | Used in construction of the <i>fasC</i> mutant strain 2221Δ <i>fasC</i> (left flank primer)                                                                                                                 |
| FASCC       | CTATTAAATAACAGATTAAAAAATTAAAGCGCTTTCGACTAAAAGTGACC            | Used in construction of the <i>fasC</i> mutant strain 2221Δ <i>fasC</i> (right flank primer)                                                                                                                |
| FASCD       | CCAAACAAGACAACACTGACATC                                       | Used in construction of the <i>fasC</i> mutant strain 2221Δ <i>fasC</i> (right flank primer)                                                                                                                |
| FASCSPECF   | GTATGGCTTATTCTATGCTACCAATACATGTTATAATAACTATAAC                | Used in construction of the <i>fasC</i> mutant strain 2221Δ <i>fasC</i> (spec cassette primer)                                                                                                              |
| FASCSPECR   | GGTCACTTTTAGTCGAAAGCGCTTATAATTTTTTAAATCTGTTATTTAAATAG         | Used in construction of the <i>fasC</i> mutant strain 2221Δ <i>fasC</i> (spec cassette primer)                                                                                                              |
| FASCE       | TTATTAATATATGATTGGAAG                                         | Used to verify the <i>fasC</i> mutant strain 2221Δ <i>fasC</i>                                                                                                                                              |
| FASCF       | GAGCCATCATATCAAAAATAC                                         | Used to verify the <i>fasC</i> mutant strain 2221Δ <i>fasC</i>                                                                                                                                              |
| M3RIVR1     | caaaatttcacagctcagcttcGAGGTGATGAAATTAGCTATAACGTACC            | Used with M3RIVR5 to generate the downstream flank used to fix the 1bp deletion in <i>rivR</i> that is present in serotype M3 isolates                                                                      |
| M3RIVR2     | GAGTATCTGATAAGGCAAAAATGTCAAAAATGCTTCTCGCTTATCATTAAATACCTC     | Used with M3RIVR5 to generate the upstream flank used to fix the 1bp deletion in <i>rivR</i> that is present in serotype M3 isolates                                                                        |
| M3RIVR3     | GAGGTATTAAATGATAAGCGAGAAGCATTITTTATGACATTTTTGCGCTTATCAGATACTC | Used with M3RIVR1 to generate the downstream flank used to fix the 1bp deletion in <i>rivR</i> that is present in serotype M3 isolates                                                                      |
| M3RIVR5     | CTTGCAATGCTATAAAAAATTAAGCCTG                                  | Used with M3RIVR2 to generate the upstream flank used to fix the 1bp deletion in <i>rivR</i> that is present in serotype M3 isolates                                                                        |
| M3RIVR8     | GGTTTATCATAGGGATAAATATTATCAG                                  | Used to verify that that 1bp deletion in the <i>rivR</i> gene has been fixed in isolates 10870 <i>rivR</i> <sup>+1bp</sup> and 10870 <i>fasC</i> <sup>Comp</sup> <i>rivR</i> <sup>+1bp</sup>                |
| M3RIVR9     | GCTCTCGACGATTTGACCAAC                                         | Used to verify that that 1bp deletion in the <i>rivR</i> gene has been fixed in isolates 10870 <i>rivR</i> <sup>+1bp</sup> and 10870 <i>fasC</i> <sup>Comp</sup> <i>rivR</i> <sup>+1bp</sup>                |
| M3FIXA      | gctaggatccTGCAGATAAATAAAAAGAGACTTAC                           | Used with M3FIXB to generate the upstream flank used to fix the <i>fasC</i> mutation that is present in serotype M3 isolates                                                                                |
| M3FIXB      | CACAATAACCCAAATAAAAAAGCTAAATAAATAAATACTAAAATAGACCGGTAC        | Used with M3FIXA to generate the upstream flank used to fix the <i>fasC</i> mutation that is present in serotype M3 isolates                                                                                |
| M3FIXC      | GTACCGGTCTATTTAGTATTTATTTAGCTATTTTTATTGGGTTATTGTG             | Used with M3FIXD to generate the downstream flank used to fix the <i>fasC</i> mutation that is present in serotype M3 isolates                                                                              |
| M3FIXD      | gctatctagaTTTGTGGAATAGCTGCAGCTAATTC                           | Used with M3FIXC to generate the downstream flank used to fix the <i>fasC</i> mutation that is present in serotype M3 isolates                                                                              |
| M3FIXE      | TATGCCCAAACGGTTTATGAAAGC                                      | Used to verify that the <i>fasC</i> gene has been fixed in isolates 10870 <i>fasC</i> <sup>Comp</sup> , 315 <i>fasC</i> <sup>Comp</sup> , and 10870 <i>fasC</i> <sup>Comp</sup> <i>rivR</i> <sup>+1bp</sup> |
| M3FIXF      | CGTAAGTATATCGGATACATTC                                        | Used to verify that the <i>fasC</i> gene has been fixed in isolates 10870 <i>fasC</i> <sup>Comp</sup> , 315 <i>fasC</i> <sup>Comp</sup> , and 10870 <i>fasC</i> <sup>Comp</sup> <i>rivR</i> <sup>+1bp</sup> |
| RIV2        | CAGAACATGGGAGCGCACTTTTtagagatgcttccatctacg                    | Used with RIVB4 to generate the upstream flank used to delete <i>rivR</i> from the genome of M3 isolate MGAS10870                                                                                           |
| RIV5        | CAAAATTTTCATCAAGCTCTAGTTCCcagataaagtgggtgctgcttc              | Used with RIV13 to generate the downstream flank used to delete <i>rivR</i> from the genome of M3 isolate MGAS10870                                                                                         |
| RIV6        | GTAGAAGCTGACGCTAACACTG                                        | Used to verify that the <i>rivR</i> gene has been deleted in strain 10870Δ <i>rivR</i>                                                                                                                      |
| RIV13       | cgtagaatgaaacatcctctaaaaAAAGTGCCTCCCATGTTCTG                  | Used with RIV5 to generate the downstream flank used to delete <i>rivR</i> from the genome of M3 isolate MGAS10870                                                                                          |
| RIVB4       | TAGTTGGAAACTACTACTCAGTAACG                                    | Used with RIV2 to generate the upstream flank used to delete <i>rivR</i> from the genome of M3 isolate MGAS10870                                                                                            |
| RIVB6       | TACCATAGCTCACTAAAGCCAACTTC                                    | Used to verify that the <i>rivR</i> gene has been deleted in strain 10870Δ <i>rivR</i>                                                                                                                      |
| PROSTMP     | TACCAATGCCGTTGCAGGAGCTAACAA                                   | <i>proS</i> taqman probe                                                                                                                                                                                    |
| PROSTMF     | GCTGACCGCAAAGTGCAAA                                           | <i>proS</i> taqman primer                                                                                                                                                                                   |
| PROSTM      | TGACTCTGTCTATGGAACCA                                          | <i>proS</i> taqman primer                                                                                                                                                                                   |
| SKATMP      | CGGCTACTTTGAGGTCAATTGATT                                      | <i>ska</i> taqman primer                                                                                                                                                                                    |
| SKATMR      | CCGAACCATCTTTGTCAGCAA                                         | <i>ska</i> taqman primer                                                                                                                                                                                    |
| SKATMP      | CAAGCGATGCAACCATTAAGTATGCAAAAC                                | <i>ska</i> taqman probe                                                                                                                                                                                     |
| GRABTMP     | TGTTGACTCACCTATCGAACAGCCTCGA                                  | <i>grab</i> taqman probe                                                                                                                                                                                    |
| GRABTMF     | GCATCAGTATTAGTCGGTTTCAAGT                                     | <i>grab</i> taqman primer                                                                                                                                                                                   |
| GRABTMR     | GGTCCGCCATTTGGAATAA                                           | <i>grab</i> taqman primer                                                                                                                                                                                   |
| HASATMP     | ACGCACTGTCTACCAATCAACAGCTAGATGTG                              | <i>hasA</i> taqman probe                                                                                                                                                                                    |
| HASATMF     | ATGATCGATGTTTAAACAAATTATGCTATTG                               | <i>hasA</i> taqman primer                                                                                                                                                                                   |
| HASATMR     | TTAAAATAACTTTTAAATTTGGAAAGGTACATCAG                           | <i>hasA</i> taqman primer                                                                                                                                                                                   |
| MGATMP      | ACGTAAACAGAAAACGCTGACGCCATTG                                  | <i>mga</i> taqman probe                                                                                                                                                                                     |
| MGATMF      | CAAGTCAACAGTGGAGAGAACTAAATTT                                  | <i>mga</i> taqman primer                                                                                                                                                                                    |
| MGATMR      | ATGGAGATGTTGAGAGCTTTGCT                                       | <i>mga</i> taqman primer                                                                                                                                                                                    |
| RIVRTMP     | ACTGTATCCAACAGCAGCGGAAGATT                                    | <i>rivR</i> taqman probe                                                                                                                                                                                    |
| RIVRTMF     | CCCGCTTGTTTGGTTTGAGT                                          | <i>rivR</i> taqman primer                                                                                                                                                                                   |
| RIVRTMR     | GGTGCAAGGCTAAGATGTTTT                                         | <i>rivR</i> taqman primer                                                                                                                                                                                   |
| RIVRCP1     | gctaggatccAACAGCAAAAATATGATTTTC                               | Used with RIVRCP2 to clone the <i>rivR</i> gene from different GAS strains and clone them into vector pDC123                                                                                                |
| RIVRCP2     | gctaatgcatAAAGACCCTCCTAGACTGTG                                | Used with RIVRCP1 to clone the <i>rivR</i> gene from different GAS strains and clone them into vector pDC123                                                                                                |
| RIVRSEOF    | GATCAAAAATAAACCATCAAAGG                                       | Used to amplify and sequence an internal region of the <i>rivR</i> gene to determine whether the allele contains the 1 bp deletion                                                                          |
| RIVRSEQR    | CTTGTCTCAACCACTTTGAC                                          | Used to amplify and sequence an internal region of the <i>rivR</i> gene to determine whether the allele contains the 1 bp deletion                                                                          |
| RIV7        | GTCAAAAAGACTTCTCTTGTAC                                        | Used to amplify the whole <i>rivR</i> gene prior to sequencing                                                                                                                                              |
| C2RIV4      | GTTTAAACCTGACCAAGTAAACC                                       | Used to amplify the whole <i>rivR</i> gene prior to sequencing                                                                                                                                              |
| M3RIVR8     | GGTTTATCATAGGGATAAATATTATCAG                                  | Used to sequence the <i>rivR</i> gene                                                                                                                                                                       |
| C2D         | TAAAAGGCGAAGGTTGTAAG                                          | Used to sequence the <i>rivR</i> gene                                                                                                                                                                       |
| C2RIV5      | GACAATACTGTTATCGGAGATG                                        | Used to sequence the <i>rivR</i> gene                                                                                                                                                                       |
| FASC87      | CAGCTGCTTAGGATTAGCATTGGTC                                     | Used to amplify and sequence an internal region of the <i>fasC</i> gene to determine whether the allele contains the 4 bp deletion                                                                          |
| FASC88      | GTTGCCGATTGCTGAATAAC                                          | Used to amplify and sequence an internal region of the <i>fasC</i> gene to determine whether the allele contains the 4 bp deletion                                                                          |

Table S1  
Table of primers and probes used in this study.

| Strain    | Serotype | Isolation year | Isolation location | <i>fasC</i> allele | <i>rivR</i> allele    |
|-----------|----------|----------------|--------------------|--------------------|-----------------------|
| MGAS1264  | M1       | 1973           | Denmark            | Wild-type          | Wild-type             |
| SF370     | M1       | 1985           | Unknown            | Wild-type          | Wild-type             |
| MGAS1508  | M1       | 1985           | Czechoslovakia     | Wild-type          | Wild-type             |
| MGAS2221  | M1       | 1988           | Australia          | Wild-type          | Wild-type             |
| MGAS313   | M1       | Late 1980s     | Wyoming, USA       | Wild-type          | Wild-type             |
| MGAS3350  | M1       | 1995           | Minnesota, USA     | Wild-type          | Wild-type             |
| MGAS5005  | M1       | 1996           | Ontario, Canada    | Wild-type          | Wild-type             |
| MGAS5804  | M1       | 1997           | Finland            | Wild-type          | Wild-type             |
| MGAS22259 | M1       | 2010           | Alberta, Canada    | Wild-type          | Wild-type             |
| MGAS1251  | M3       | 1920s          | UK                 | 4bp deletion       | SNPs                  |
| MGAS1254  | M3       | 1937           | New York, USA      | 4bp deletion       | 1bp deletion and SNPs |
| MGAS182   | M3       | 1940s          | Ottawa, Canada     | 4bp deletion       | 1bp deletion and SNPs |
| MGAS174   | M3       | 1940s          | Ottawa, Canada     | 4bp deletion       | 1bp deletion and SNPs |
| MGAS1372  | M3       | 1969           | Berlin, Germany    | 4bp deletion       | 1bp deletion and SNPs |
| MGAS1385  | M3       | 1971           | Madgeburg, Germany | 4bp deletion       | 1bp deletion and SNPs |
| MGAS1392  | M3       | 1972           | Leipzig, Germany   | 4bp deletion       | 1bp deletion and SNPs |
| MGAS1404  | M3       | 1973           | Madgeburg, Germany | 4bp deletion       | 1bp deletion and SNPs |
| MGAS1428  | M3       | 1974           | Cottbus, Germany   | 4bp deletion       | 1bp deletion and SNPs |
| MGAS1308  | M3       | 1981           | Schwerin, Germany  | 4bp deletion       | 1bp deletion and SNPs |
| MGAS1319  | M3       | 1982           | Chemnitz, Germany  | 4bp deletion       | 1bp deletion and SNPs |
| MGAS1344  | M3       | 1983           | Rostock, Germany   | 4bp deletion       | 1bp deletion and SNPs |
| MGAS1519  | M3       | 1987           | Moscow, Russia     | 4bp deletion       | 1bp deletion and SNPs |
| MGAS315   | M3       | 1980s          | Texas, USA         | 4bp deletion       | 1bp deletion and SNPs |
| MGAS157   | M3       | Late 1980s     | Minnesota, USA     | 4bp deletion       | 1bp deletion and SNPs |
| MGAS159   | M3       | Late 1980s     | Utah, USA          | 4bp deletion       | 1bp deletion and SNPs |
| MGAS1610  | M3       | Late 1980s     | USA                | 4bp deletion       | 1bp deletion and SNPs |
| MGAS1638  | M3       | Late 1980s     | USA                | 4bp deletion       | 1bp deletion and SNPs |
| MGAS491   | M3       | Pre-1991       | UK                 | 4bp deletion       | 1bp deletion and SNPs |
| MGAS3370  | M3       | 1992           | Ontario, Canada    | 4bp deletion       | 1bp deletion and SNPs |
| MGAS3664  | M3       | 1992           | Ontario, Canada    | 4bp deletion       | 1bp deletion and SNPs |
| MGAS10051 | M3       | 1993           | Ontario, Canada    | 4bp deletion       | 1bp deletion and SNPs |
| SSI-1     | M3       | 1994           | Japan              | 4bp deletion       | 1bp deletion and SNPs |
| MGAS3374  | M3       | 1994           | Ontario, Canada    | 4bp deletion       | 1bp deletion and SNPs |
| MGAS3376  | M3       | 1994           | Ontario, Canada    | 4bp deletion       | 1bp deletion and SNPs |
| MGAS3378  | M3       | 1994           | Ontario, Canada    | 4bp deletion       | 1bp deletion and SNPs |
| MGAS3382  | M3       | 1994           | Ontario, Canada    | 4bp deletion       | 1bp deletion and SNPs |
| MGAS10002 | M3       | 1994           | Ontario, Canada    | 4bp deletion       | 1bp deletion and SNPs |
| MGAS10003 | M3       | 1994           | Ontario, Canada    | 4bp deletion       | 1bp deletion and SNPs |
| MGAS10006 | M3       | 1994           | Ontario, Canada    | 4bp deletion       | 1bp deletion and SNPs |
| MGAS10738 | M3       | 1994           | Ontario, Canada    | 4bp deletion       | 1bp deletion and SNPs |
| MGAS3318  | M3       | 1995           | Minnesota, USA     | 4bp deletion       | 1bp deletion and SNPs |
| MGAS3385  | M3       | 1995           | Ontario, Canada    | 4bp deletion       | 1bp deletion and SNPs |
| MGAS3392  | M3       | 1995           | Ontario, Canada    | 4bp deletion       | 1bp deletion and SNPs |
| MGAS3394  | M3       | 1995           | Ontario, Canada    | 4bp deletion       | 1bp deletion and SNPs |
| MGAS3397  | M3       | 1995           | Ontario, Canada    | 4bp deletion       | 1bp deletion and SNPs |
| MGAS3452  | M3       | 1995           | Ontario, Canada    | 4bp deletion       | 1bp deletion and SNPs |
| MGAS3475  | M3       | 1995           | Ontario, Canada    | 4bp deletion       | 1bp deletion and SNPs |
| MGAS10021 | M3       | 1995           | Ontario, Canada    | 4bp deletion       | 1bp deletion and SNPs |
| MGAS10024 | M3       | 1995           | Ontario, Canada    | 4bp deletion       | 1bp deletion and SNPs |
| MGAS10025 | M3       | 1995           | Ontario, Canada    | 4bp deletion       | 1bp deletion and SNPs |
| MGAS10029 | M3       | 1995           | Ontario, Canada    | 4bp deletion       | 1bp deletion and SNPs |
| MGAS10742 | M3       | 1995           | Ontario, Canada    | 4bp deletion       | 1bp deletion and SNPs |
| MGAS10041 | M3       | 1996           | Ontario, Canada    | 4bp deletion       | 1bp deletion and SNPs |
| MGAS10044 | M3       | 1996           | Ontario, Canada    | 4bp deletion       | 1bp deletion and SNPs |



|           |    |      |                 |              |                       |
|-----------|----|------|-----------------|--------------|-----------------------|
| MGAS15009 | M3 | 2004 | Ontario, Canada | 4bp deletion | 1bp deletion and SNPs |
| MGAS15013 | M3 | 2005 | Ontario, Canada | 4bp deletion | 1bp deletion and SNPs |
| MGAS15017 | M3 | 2005 | Ontario, Canada | 4bp deletion | 1bp deletion and SNPs |
| MGAS15021 | M3 | 2005 | Ontario, Canada | 4bp deletion | 1bp deletion and SNPs |
| MGAS15025 | M3 | 2005 | Ontario, Canada | 4bp deletion | 1bp deletion and SNPs |
| MGAS15027 | M3 | 2005 | Ontario, Canada | 4bp deletion | 1bp deletion and SNPs |
| MGAS15028 | M3 | 2005 | Ontario, Canada | 4bp deletion | 1bp deletion and SNPs |
| MGAS15029 | M3 | 2005 | Ontario, Canada | 4bp deletion | 1bp deletion and SNPs |
| MGAS15034 | M3 | 2005 | Ontario, Canada | 4bp deletion | 1bp deletion and SNPs |
| MGAS15035 | M3 | 2005 | Ontario, Canada | 4bp deletion | 1bp deletion and SNPs |
| MGAS15040 | M3 | 2005 | Ontario, Canada | 4bp deletion | 1bp deletion and SNPs |
| MGAS15043 | M3 | 2005 | Ontario, Canada | 4bp deletion | 1bp deletion and SNPs |
| MGAS15045 | M3 | 2006 | Ontario, Canada | 4bp deletion | 1bp deletion and SNPs |
| MGAS15049 | M3 | 2006 | Ontario, Canada | 4bp deletion | 1bp deletion and SNPs |
| MGAS15051 | M3 | 2006 | Ontario, Canada | 4bp deletion | 1bp deletion and SNPs |
| MGAS15053 | M3 | 2006 | Ontario, Canada | 4bp deletion | 1bp deletion and SNPs |
| MGAS15057 | M3 | 2006 | Ontario, Canada | 4bp deletion | 1bp deletion and SNPs |
| MGAS15058 | M3 | 2006 | Ontario, Canada | 4bp deletion | 1bp deletion and SNPs |
| MGAS15061 | M3 | 2006 | Ontario, Canada | 4bp deletion | 1bp deletion and SNPs |
| MGAS15184 | M3 | 2006 | Ontario, Canada | 4bp deletion | 1bp deletion and SNPs |
| MGAS15188 | M3 | 2007 | Ontario, Canada | 4bp deletion | 1bp deletion and SNPs |
| MGAS15192 | M3 | 2007 | Ontario, Canada | 4bp deletion | 1bp deletion and SNPs |
| MGAS15196 | M3 | 2007 | Ontario, Canada | 4bp deletion | 1bp deletion and SNPs |
| MGAS15200 | M3 | 2007 | Ontario, Canada | 4bp deletion | 1bp deletion and SNPs |
| MGAS22283 | M3 | 2010 | Alberta, Canada | 4bp deletion | 1bp deletion and SNPs |
| MGAS22440 | M3 | 2010 | Alberta, Canada | 4bp deletion | 1bp deletion and SNPs |

**Table S2**  
**Clinical GAS isolates used in this study.**
